# Supplementary material for: Decomposing litter and associated microbial activity responses to nitrogen deposition in two subtropical forests containing nitrogen-fixing or non-nitrogen-fixing tree species
Source: PubMed Central journal article supplement (PMC6113256; doi:10.1038/s41598-018-30666-5), 2018-08-28
Supplement: 41598_2018_30666_MOESM1_ESM.pdf [file 41598_2018_30666_MOESM1_ESM.pdf]

## Supplementary information

# **Decomposing litter and associated microbial activity responses to nitrogen deposition in two subtropical forests containing nitrogen-fixing or non-nitrogen-fixing tree species**

Guixiang Zhou<sup>1,2</sup>, Jiabao Zhang<sup>2</sup>, Xiuwen Qiu<sup>1\*</sup>, Feng Wei<sup>3</sup>, Xiaofeng Xu<sup>3</sup>

<sup>1</sup> Poyang Lake Eco-economy Research Center, Jiujiang University, Jiujiang 332005, China

<sup>2</sup> State Key Laboratory of Soil and Sustainable Agriculture, Institute of Soil Science, Chinese Academy of Sciences, Nanjing 210008, China

<sup>3</sup> Jiangxi Agricultural University, Nanchang 330045, China

Correspondence and requests for materials should be addressed to X.W.Q. (email: qiuxiuwen5@163.com)

**Figure S1.** The litter decay rate of *AC* and *LF*. Different lowercase indicated significant difference between treatments at each plantation) (Tukey's HSD,  $P < 0.05$ ).

**Table S1.** Significances of ANOVA for enzyme activity in two plantations.

**Table S2.** Significances of relationships between enzymes activities and litter characteristics.

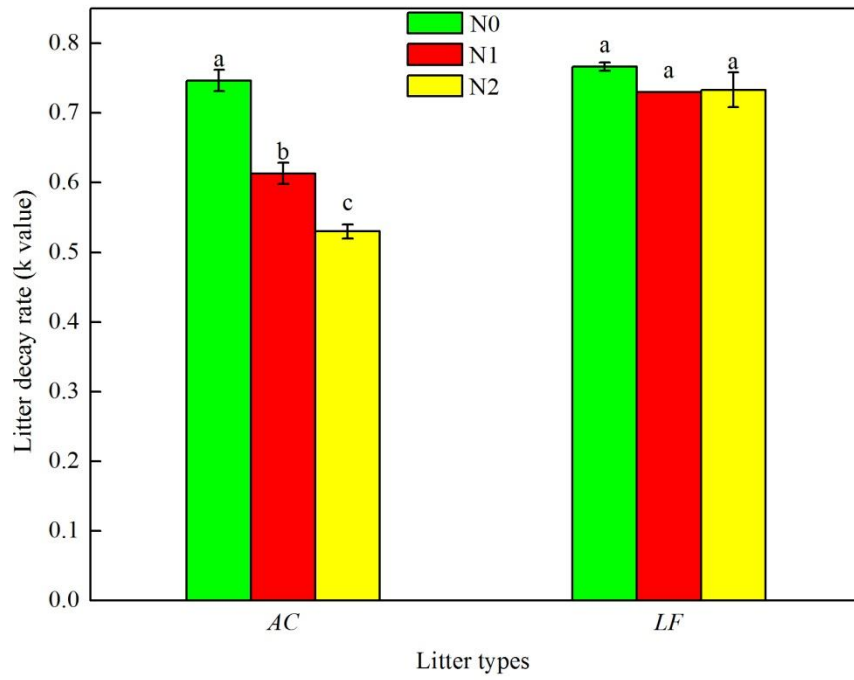

**Figure S1.** The litter decay rate of *AC* and *LF*. Different lowercase indicated significant difference between treatments at each plantation) (Tukey's HSD,  $P < 0.05$ ).

**Table S1.** Significances of ANOVA for enzyme activity in two plantations.

| Source of variation           | $\beta$ -glucosidase |       | Cellobiohydrolase |       | Endocellulase |       | Phenol oxidase |   | Peroxidase |       |
|-------------------------------|----------------------|-------|-------------------|-------|---------------|-------|----------------|---|------------|-------|
|                               | F                    | P     | F                 | P     | F             | P     | F              | P | F          | P     |
| Type                          | 282.41               | 0     | 2.60              | 0.12  | 14.12         | 0.001 | 37.01          | 0 | 234.17     | 0     |
| Time                          | 642.10               | 0     | 874.04            | 0     | 130.96        | 0     | 6034.18        | 0 | 5015.75    | 0     |
| N                             | 89.72                | 0     | 151.00            | 0     | 7.23          | 0.003 | 96.88          | 0 | 6.19       | 0.007 |
| Type $\times$ Time            | 1.97                 | 0.174 | 115.02            | 0     | 24.53         | 0     | 45.21          | 0 | 169.39     | 0     |
| Type $\times$ N               | 19.05                | 0     | 5.19              | 0.013 | 6.35          | 0.006 | 38.90          | 0 | 8.20       | 0.002 |
| Time $\times$ N               | 60.76                | 0     | 15.98             | 0     | 17.48         | 0     | 93.01          | 0 | 15.01      | 0     |
| Type $\times$ Time $\times$ N | 24.59                | 0     | 37.25             | 0     | 0.15          | 0.863 | 21.48          | 0 | 12.06      | 0     |

**Table S2.** Significances of relationships between enzymes activities and litter characteristics.

| Source of variation | $\beta$ -glucosidase |          | Cellobiohydrolase |          | Endocellulase |          | Phenol oxidase |          | Peroxidase |          |
|---------------------|----------------------|----------|-------------------|----------|---------------|----------|----------------|----------|------------|----------|
|                     | F                    | <i>P</i> | F                 | <i>P</i> | F             | <i>P</i> | F              | <i>P</i> | F          | <i>P</i> |
| Litter C            | -0.695               | ***      | -0.734            | ***      | -0.707        | ***      | -0.951         | ***      | -0.92      | ***      |
|                     |                      |          |                   |          |               |          |                |          | 4          |          |
| Litter N            | -0.676               | ***      | -0.612            | ***      | -0.696        | ***      | -0.886         | ***      | -0.88      | ***      |
| Cellulose           | -0.621               | ***      | -0.709            | ***      | -0.685        | ***      | -0.922         | ***      | -0.83      | ***      |
| Lignin              | -0.445               | **0.007  | -0.708            | ***      | -0.464        | ***      | -0.892         | ***      | -0.86      | ***      |
|                     |                      | 7        |                   |          |               |          |                |          |            |          |
| C:N                 | 0.13                 | 0.451    | -0.057            | 0.74     | 0.078         | 0.65     | 0.085          | 0.623    | 0.141      | 0.412    |
| Lignin:N            | 0.011                | 0.951    | -0.444            | **0.007  | -0.052        | 0.76     | -0.466         | **0.004  | -0.38      | *0.019   |
|                     |                      |          |                   |          |               |          |                |          | 9          |          |
